# Supplementary material for: Preparation of a novel β-CD–dimanganese complex with covalently bound photosensitizer
Source: Royal Society of Chemistry journal article supplement (doi:10.1039/b103363h), 2001-01-01
Supplement: b103363h2.doc [file b103363h2.doc]

Elemental analysis

|  | CDNHphen.10H2O | | RuCDNHphen.6H2O, **2** | | Mn2RuCDNHphen.6H2O, **1** | |
| --- | --- | --- | --- | --- | --- | --- |
| Element | Calc. | Found | Calc. | Found | Calc. | Found |
| C  H  N  Mn | 43.46%  6.51%  2.82%  ---- | 42.83%  6.89%  2.41%  --- | 46.64%  5.93%  5.15%  ---- | 44.31%  6.07%  4.81%  ---- | 43.43%  5.43%  4.80%  5.37% | 42.89%  5.98%  4.61%  5.64% |
