# Supplementary material for: Preparation of a novel β-CD–dimanganese complex with covalently bound photosensitizer
Source: Royal Society of Chemistry journal article supplement (doi:10.1039/b103363h), 2001-01-01

Cyclic Voltammetry of **1** and **2** at room temperature in dry DMF containing 0.1 M TEAP as supporting electrolyte at a 5m radius Pt working electrode and Ag/AgCl reference electrode, scan rate; 0.5 V s-1., (a) Oxidation, (b) Reduction.


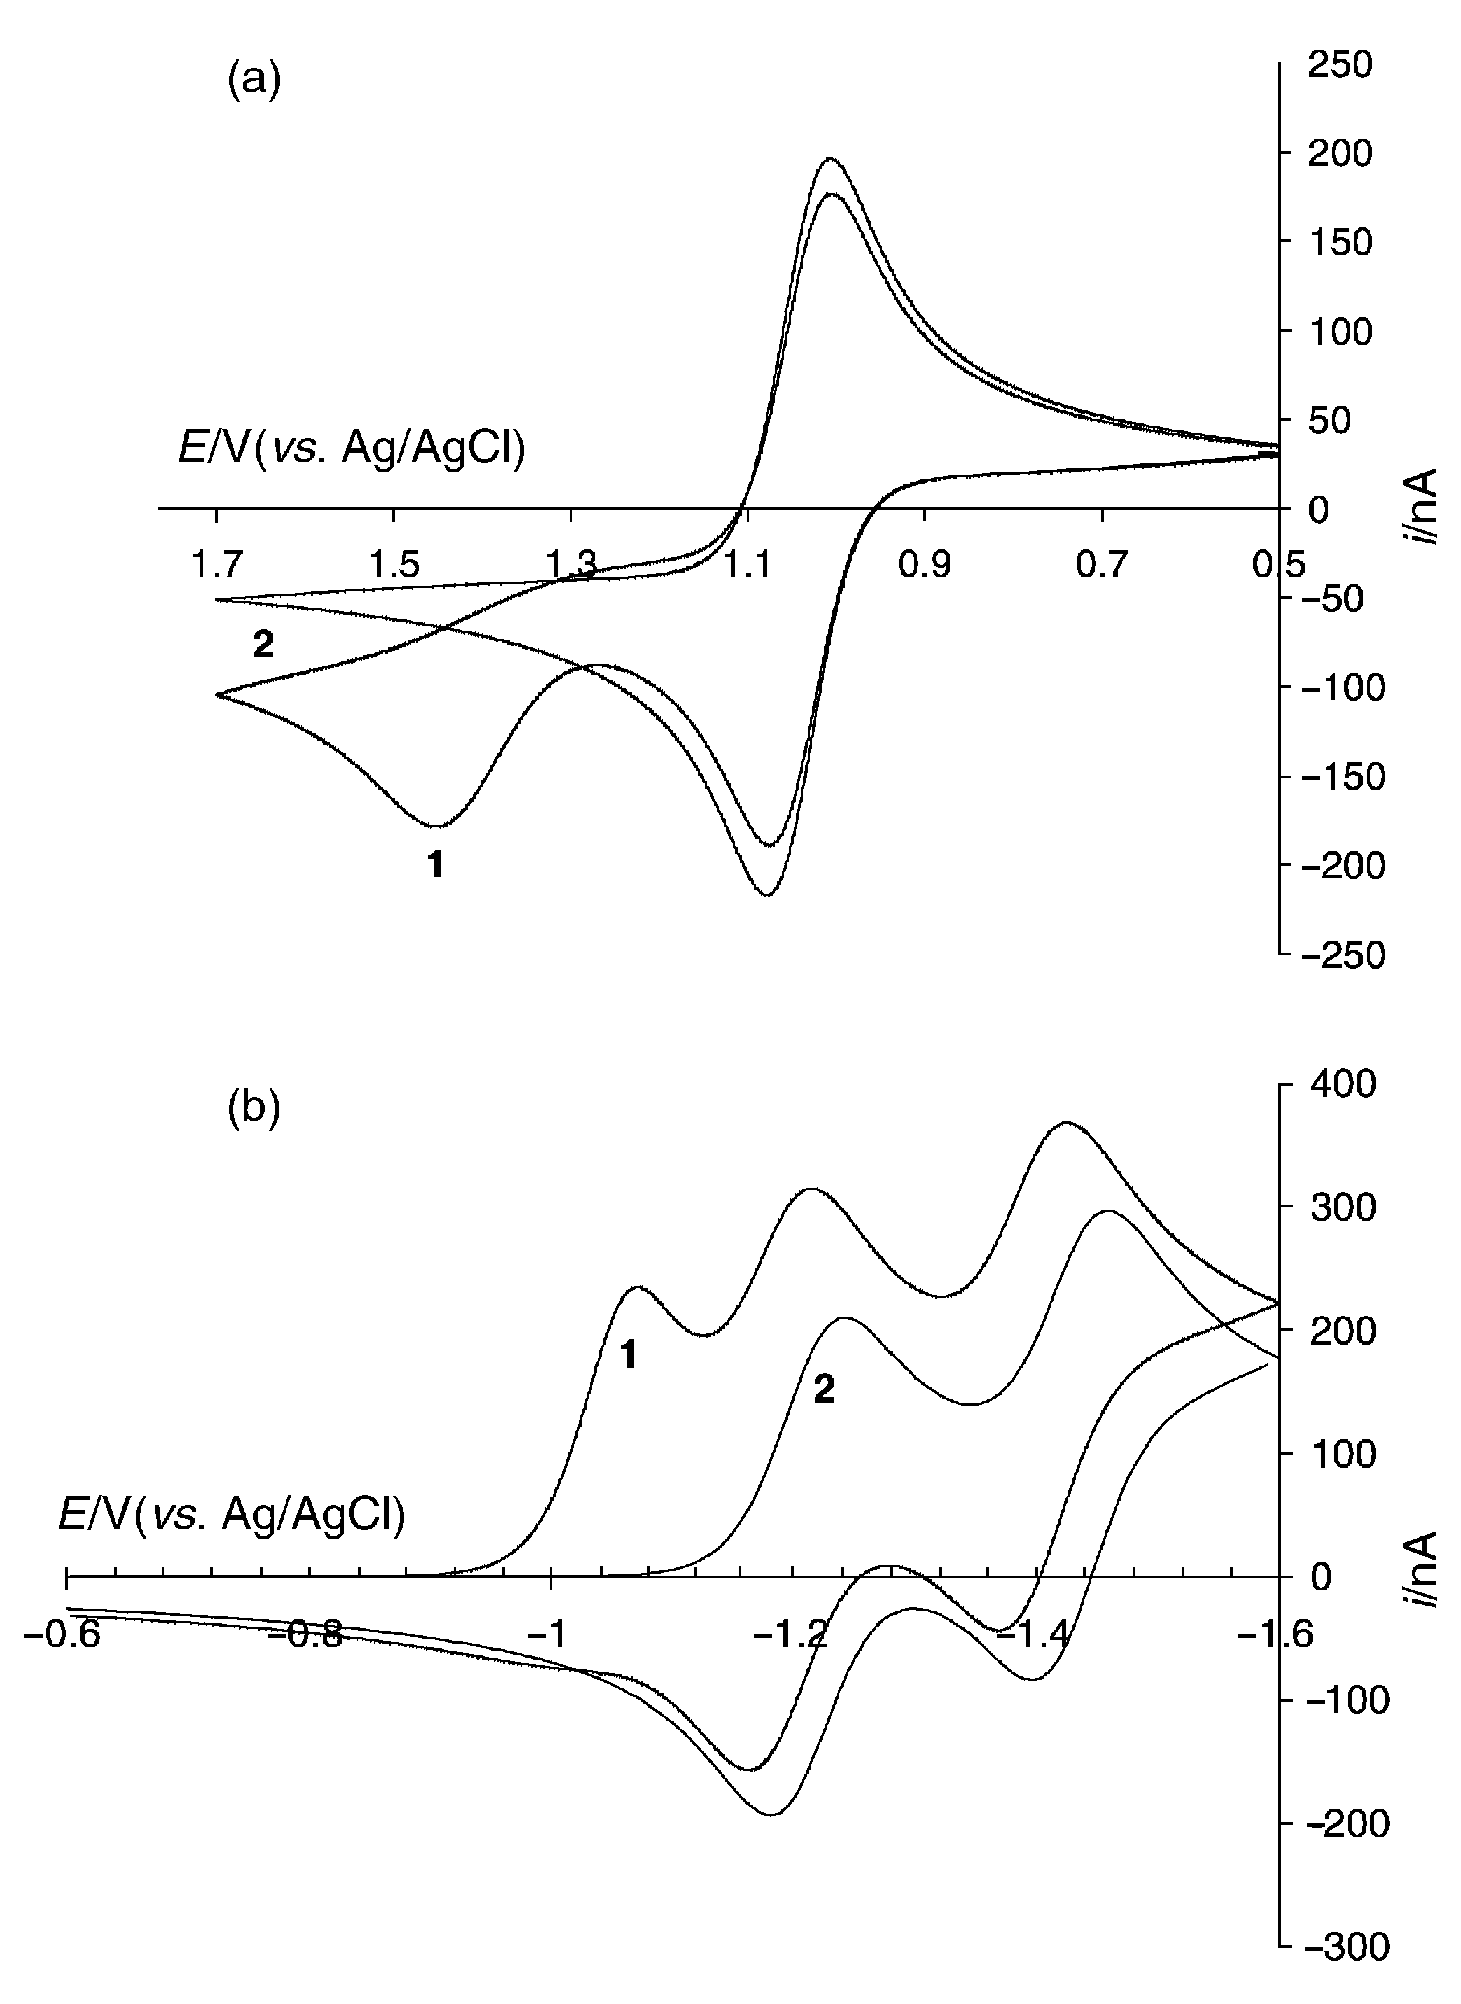

Supplement: b103363h3.doc [file b103363h3.doc]
